# Supplementary material for: Prevalence and Risk of Infection in Patients with Diabetes following Primary Total Knee Arthroplasty: A Global Systematic Review and Meta-Analysis of 120,754 Knees
Source: MDPI journal article supplement (doi:10.3390/jcm11133752), 2022-06-28
Supplement: s1 [file s1]

## A

### Excluding outlier studies

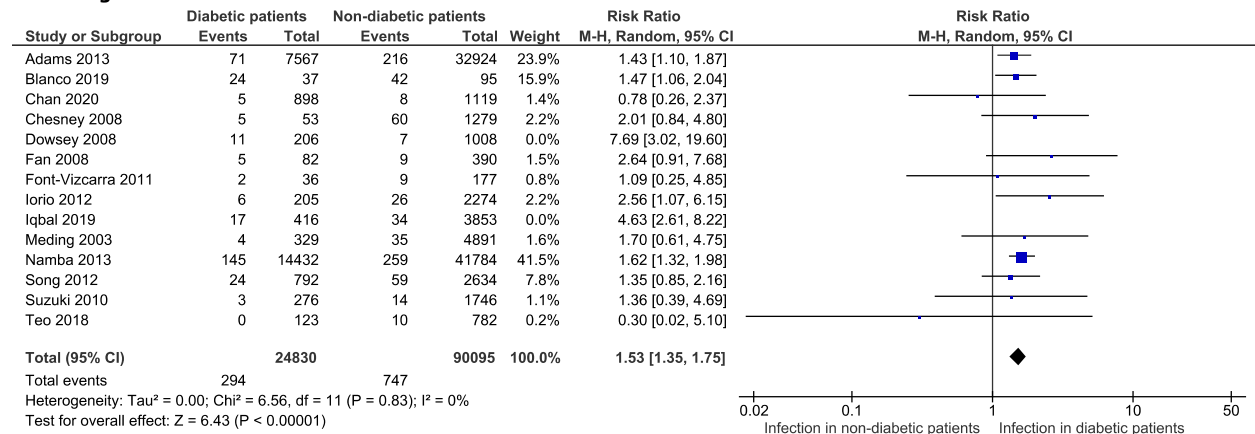

## B

### Excluding small studies

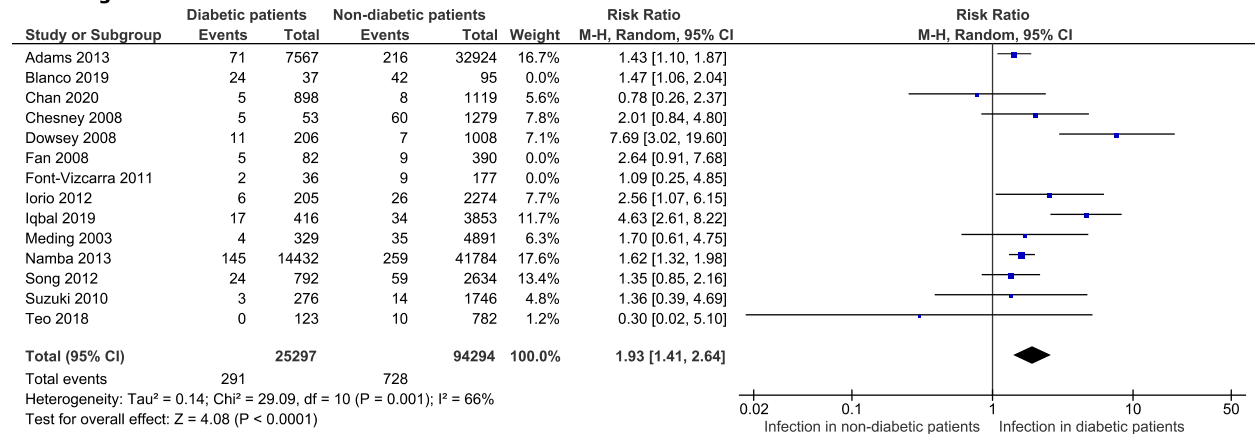

## C

### Excluding low- and moderate-quality studies

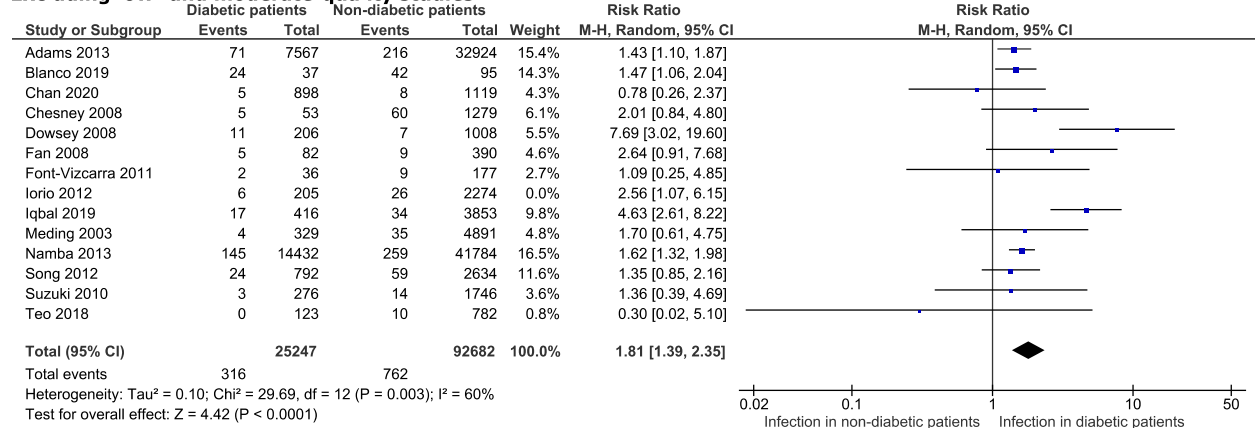

**D**

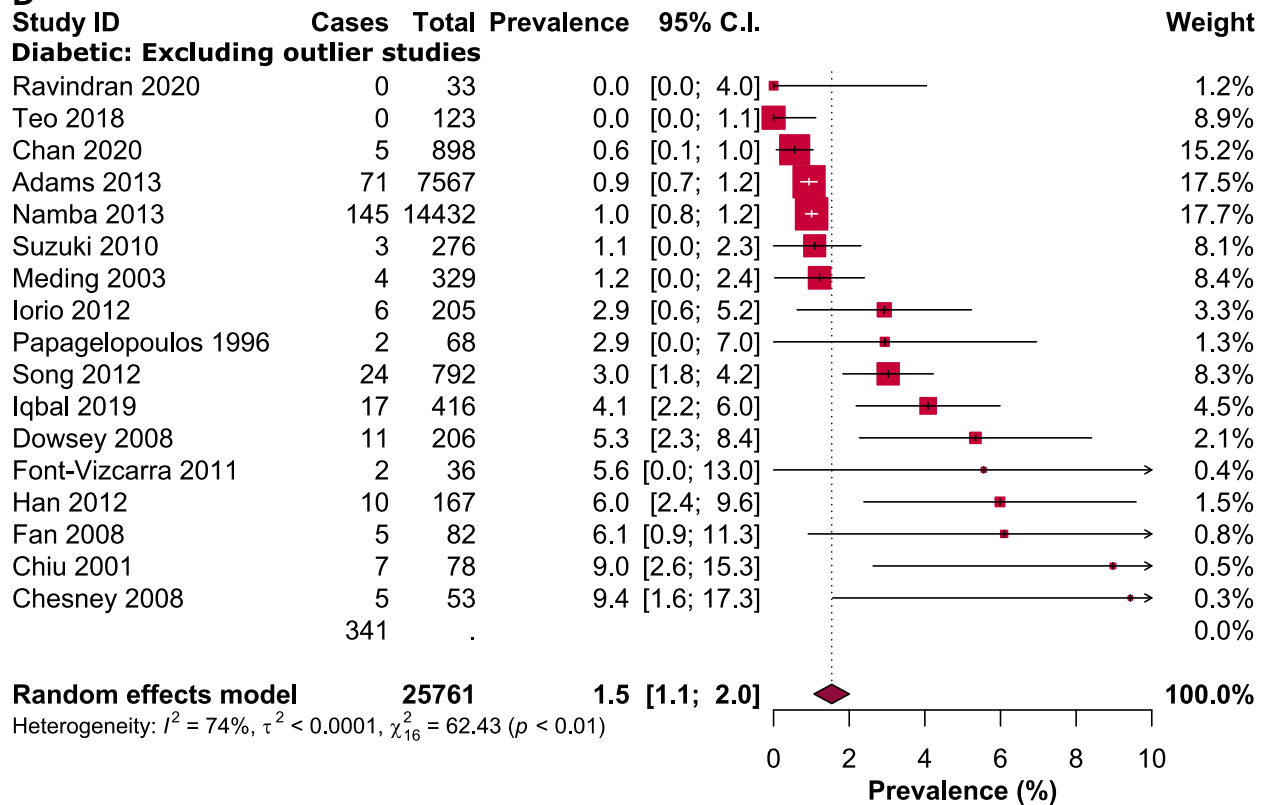

**E**

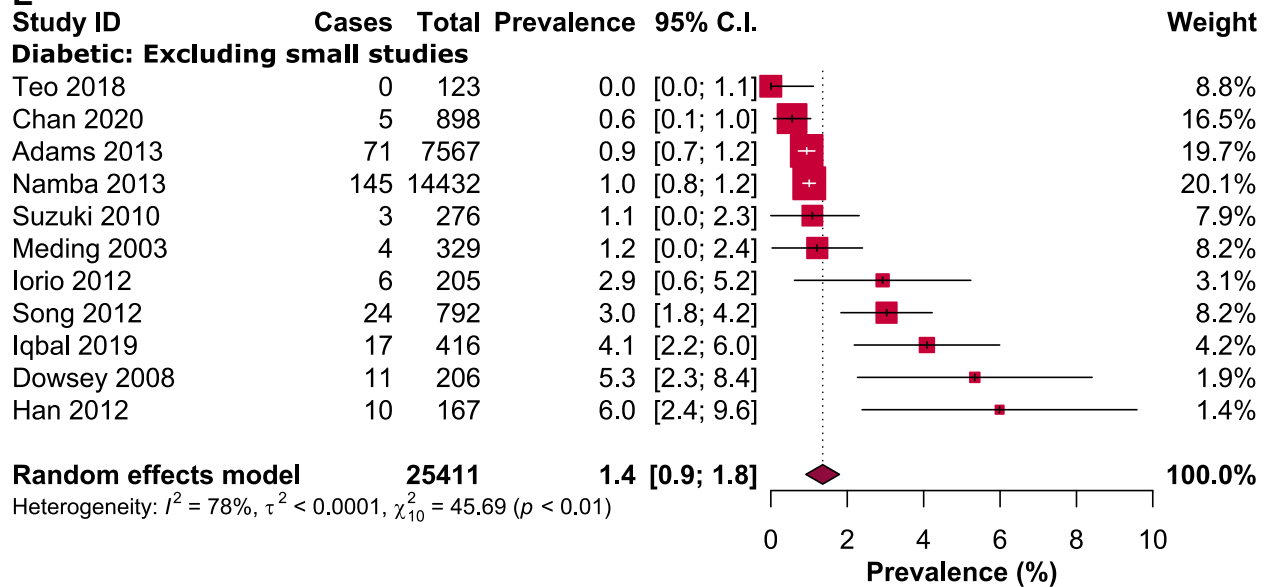

**F**

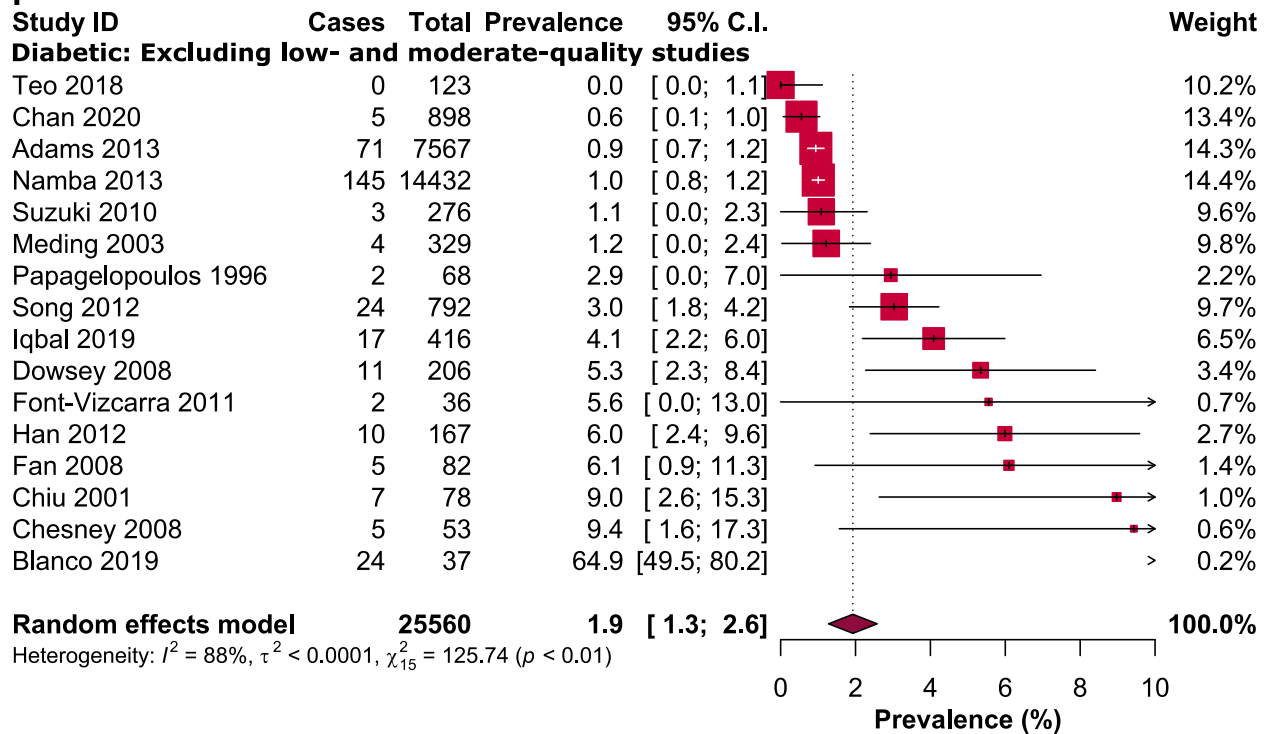

**G**

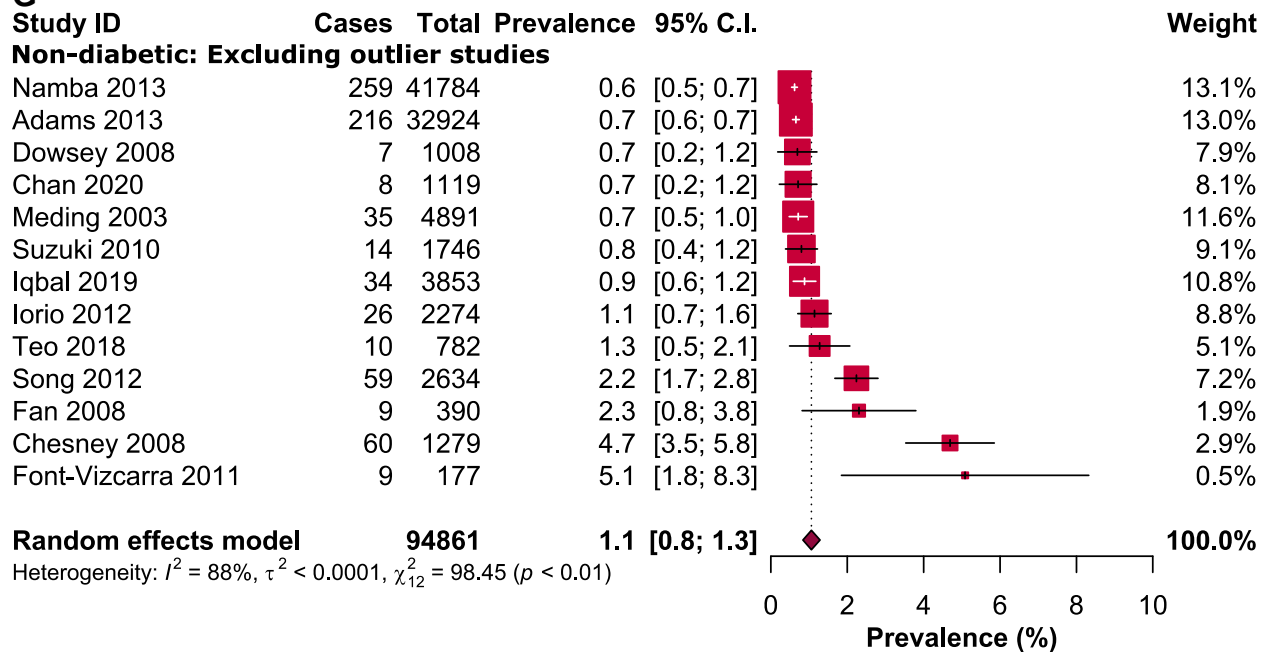

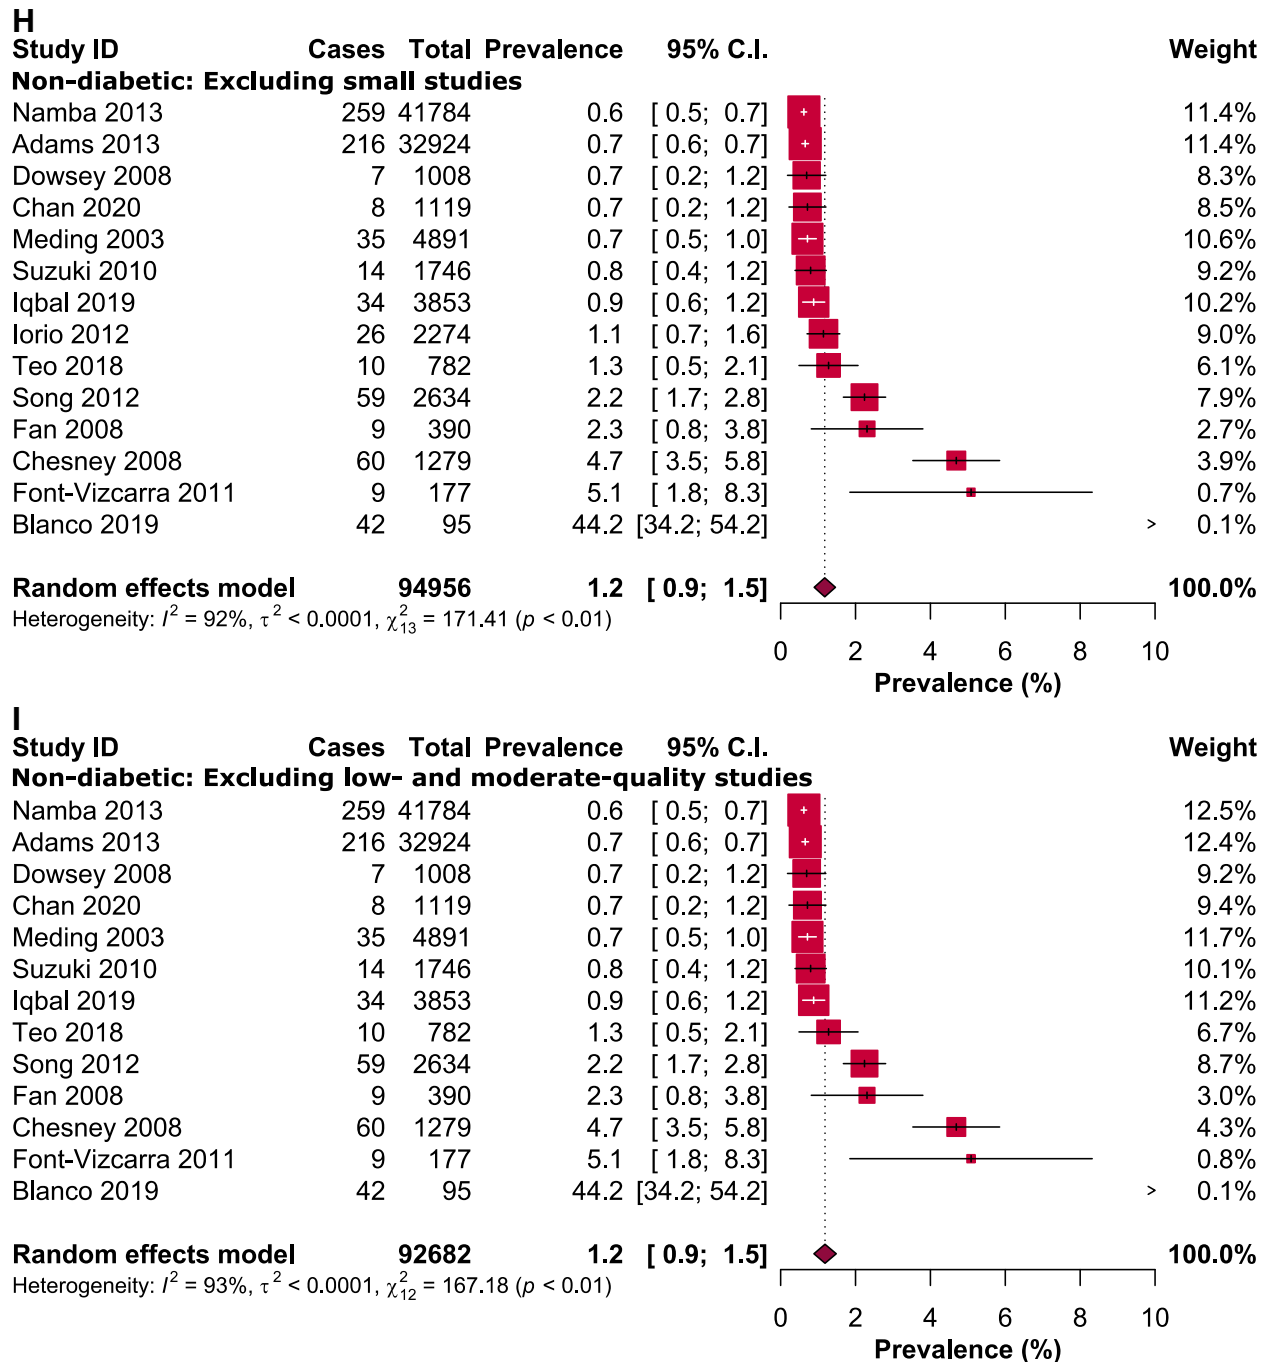

**Figure S1.** Sensitivity analyses.

**Table S1.** Search strategies

| Databases      | Search strategies                                                                                                                                                                                                                                                                         |
|----------------|-------------------------------------------------------------------------------------------------------------------------------------------------------------------------------------------------------------------------------------------------------------------------------------------|
| PubMed         | (knee replacement[Title/Abstract] OR knee replacements[Title/Abstract] OR knee arthroplasty[Title/Abstract] OR knee arthroplasties[Title/Abstract] OR TKA[Title/Abstract] OR TKR[Title/Abstract]) AND (Diabetic[Title/Abstract] OR Diabetics[Title/Abstract] OR diabetes[Title/Abstract]) |
| Scopus         | TITLE-ABS("knee replacement" OR "knee replacements" OR "knee arthroplasty" OR "knee arthroplasties" OR TKA OR TKR) AND TITLE-ABS(Diabetic OR Diabetics OR diabetes)                                                                                                                       |
| Web of Science | TI=("knee replacement" OR "knee replacements" OR "knee arthroplasty" OR "knee arthroplasties" OR TKA OR TKR) AND TI=(Diabetic OR Diabetics OR diabetes)<br><br><i>Indexes=SCI-EXPANDED, SSCI, A&amp;HCI, CPCI-S, CPCI-SSH, BKCI-S, BKCI-SSH, ESCI Timespan=All years</i>                  |
| ScienceDirect  | Title, abstract, keywords: ("knee replacement" OR "knee replacements" OR "knee arthroplasty" OR "knee arthroplasties" OR TKA OR TKR) AND (Diabetic OR Diabetics OR diabetes)                                                                                                              |
| Google Scholar | allintitle:("knee replacement" OR "knee replacements" OR "knee arthroplasty" OR "knee arthroplasties" OR TKA OR TKR) (Diabetic OR Diabetics OR diabetes)                                                                                                                                  |

**Table S2.** Quality assessment of the included case-control studies

| No. | Study ID           | Questions assessing the included case-control studies |   |   |   |   |   |   |   |   |    | Yes (%) |
|-----|--------------------|-------------------------------------------------------|---|---|---|---|---|---|---|---|----|---------|
|     |                    | 1                                                     | 2 | 3 | 4 | 5 | 6 | 7 | 8 | 9 | 10 |         |
| 1   | Adams 2013         | Y                                                     | U | Y | Y | Y | Y | Y | Y | Y | Y  | 90.0    |
| 2   | Blanco 2019        | Y                                                     | Y | Y | Y | Y | Y | U | Y | U | Y  | 80.0    |
| 3   | Chan 2020          | Y                                                     | Y | Y | Y | Y | U | Y | U | Y | Y  | 80.0    |
| 4   | Chesney 2008       | Y                                                     | U | Y | Y | Y | Y | Y | Y | Y | Y  | 90.0    |
| 5   | Dowsey 2008        | Y                                                     | U | Y | Y | Y | Y | Y | Y | Y | Y  | 90.0    |
| 6   | Fan 2008           | Y                                                     | U | Y | Y | Y | Y | U | Y | Y | Y  | 80.0    |
| 7   | Font-Vizcarra 2011 | Y                                                     | U | Y | U | Y | Y | Y | Y | Y | Y  | 80.0    |
| 8   | Iorio 2012         | Y                                                     | U | Y | Y | Y | U | U | U | Y | Y  | 60.0    |
| 9   | Iqbal 2019         | Y                                                     | U | Y | U | Y | Y | Y | Y | Y | Y  | 80.0    |
| 10  | Meding 2003        | Y                                                     | U | Y | Y | Y | Y | Y | U | Y | Y  | 80.0    |
| 11  | Namba 2013         | Y                                                     | U | U | Y | Y | Y | Y | Y | Y | Y  | 80.0    |
| 12  | Song 2012          | Y                                                     | U | Y | U | Y | Y | Y | Y | Y | Y  | 80.0    |
| 13  | Suzuki 2010        | Y                                                     | U | Y | Y | Y | Y | Y | U | Y | Y  | 80.0    |
| 14  | Teo 2018           | Y                                                     | U | Y | Y | Y | Y | Y | U | Y | Y  | 80.0    |

1. Were the groups comparable other than the presence of disease in cases or the absence of disease in controls? 2. Were cases and controls matched appropriately? 3. Were the same criteria used for identification of cases and controls? 4. Was exposure measured in a standard, valid and reliable way? 5. Was exposure measured in the same way for cases and controls? 6. Were confounding factors identified? 7. Were strategies to deal with confounding factors stated? 8. Were outcomes assessed in a standard, valid and reliable way for cases and controls? 9. Was the exposure period of interest long enough to be meaningful? 10. Was appropriate statistical analysis used? Y=Yes; N=No; U=Unclear.

**Table S3.** Quality assessment of the included cohort studies

| No. | Study ID            | Questions assessing the included cohort studies |   |   |   |   |   |   |   |   |    |    | Yes (%) |
|-----|---------------------|-------------------------------------------------|---|---|---|---|---|---|---|---|----|----|---------|
|     |                     | 1                                               | 2 | 3 | 4 | 5 | 6 | 7 | 8 | 9 | 10 | 11 |         |
| 1   | Chiu 2001           | Y                                               | Y | Y | Y | Y | Y | Y | Y | Y | U  | Y  | 90.9    |
| 2   | Han 2012            | Y                                               | Y | Y | Y | Y | Y | Y | Y | U | U  | Y  | 81.8    |
| 3   | Papagelopoulos 1996 | Y                                               | U | U | Y | Y | Y | U | Y | Y | Y  | Y  | 72.7    |
| 4   | Ravindran 2020      | Y                                               | Y | Y | Y | U | Y | U | Y | U | U  | Y  | 63.6    |

1. Were the two groups similar and recruited from the same population? 2. Were the exposures measured similarly to assign people to both exposed and unexposed groups? 3. Was the exposure measured in a valid and reliable way? 4. Were confounding factors identified? 5. Were strategies to deal with confounding factors stated? 6. Were the groups/participants free of the outcome at the start of the study (or at the moment of exposure)? 7. Were the outcomes measured in a valid and reliable way? 8. Was the follow up time reported and sufficient to be long enough for outcomes to occur? 9. Was follow up complete, and if not, were the reasons to loss to follow up described and explored? 10. Were strategies to address incomplete follow up utilized? 11. Was appropriate statistical analysis used? Y=Yes; N=No; U=Unclear, NA=Not applicable.
